# Supplementary material
Source: publisher figshare collection journal article supplement (https://geolsoc.figshare.com/articles/dataset/_/3454760)
Supplement: Supplementary file 1 [file 1]

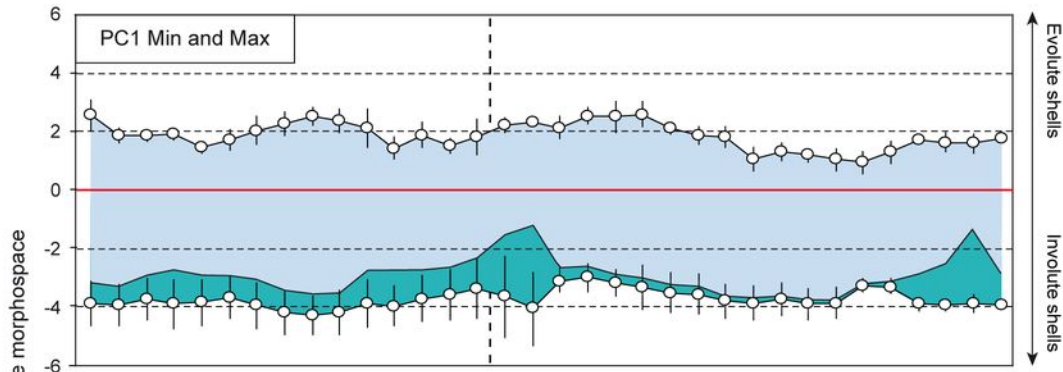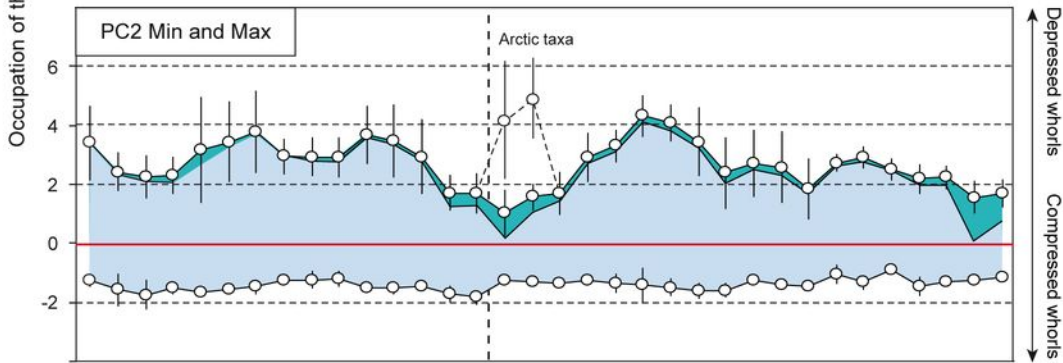

|         |               |      |       |      |      |        |      |           |      |      |       |      |        |      |       |          |       |      |            |      |      |             |       |       |       |        |        |       |        |      |      |      |      |       |
|---------|---------------|------|-------|------|------|--------|------|-----------|------|------|-------|------|--------|------|-------|----------|-------|------|------------|------|------|-------------|-------|-------|-------|--------|--------|-------|--------|------|------|------|------|-------|
| Subzone | Taylor        | Poly | Brevi | Jame | Mass | Valid  | Luri | Mecu      | Capr | Figu | Stok  | Subn | Gibb   | Apyr | Hawas | Palt     | Semi  | Eleg | Falci      | Subl | Bifr | Van         | Illus | Villo | Bing  | Striat | Fasci  | Falla | Insig  | Grun | Leve | Pseu | Mact | Fluit |
| Zone    | Jamesoni      |      | Ibex  |      |      | Davoei |      | Margarit. |      |      | Spin. |      | Tenui. |      | Serp. |          | Bifr. |      | Variabilis |      |      | Thouarsense |       |       | Disp. |        | Pseud. |       | Aalen. |      |      |      |      |       |
| Stage   | PLIENSBACHIAN |      |       |      |      |        |      |           |      |      |       |      |        |      |       | TOARCIAN |       |      |            |      |      |             |       |       |       |        |        |       |        |      |      |      |      |       |
