# Supplementary material
Source: publisher figshare collection journal article supplement (https://geolsoc.figshare.com/articles/dataset/_/3454760)
Supplement: Supplementary file 2 [file 1]

### EXTINCTION RATES (GENERA)

### ORIGINATION RATES (GENERA)

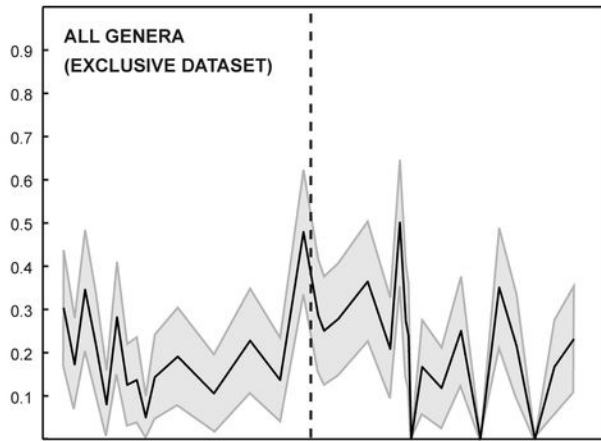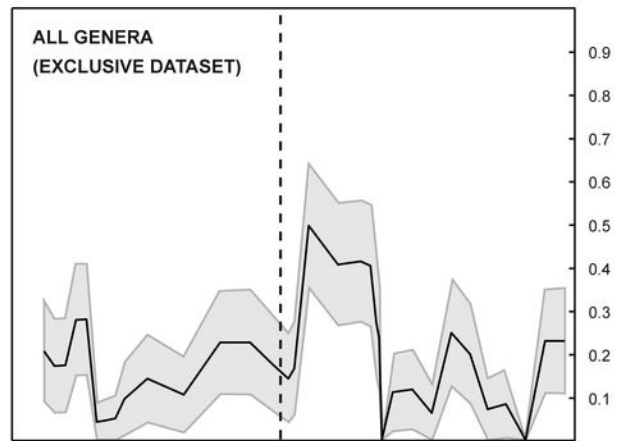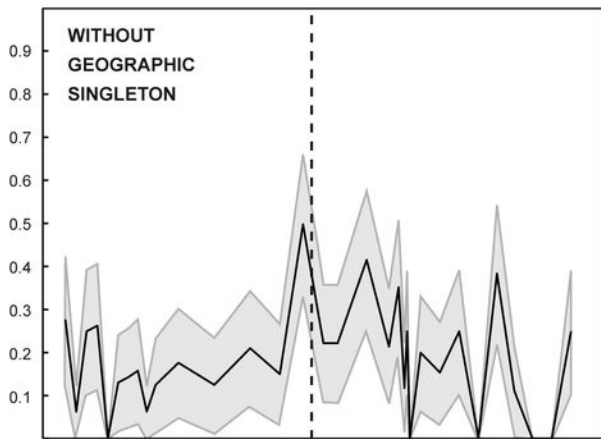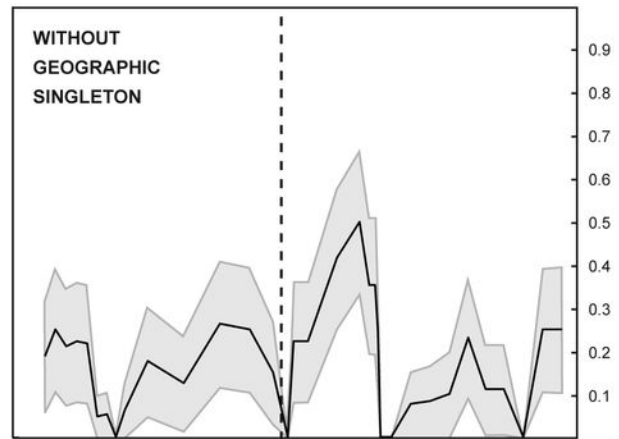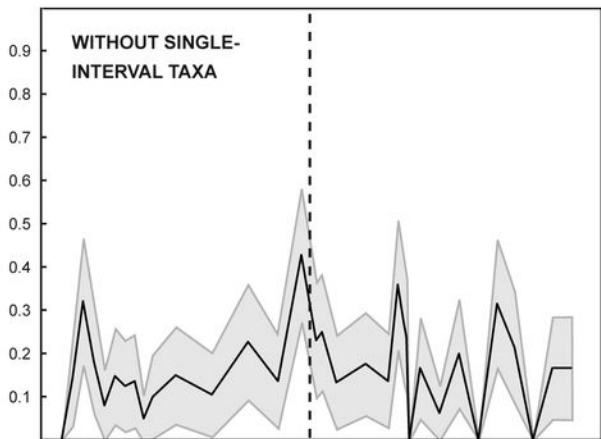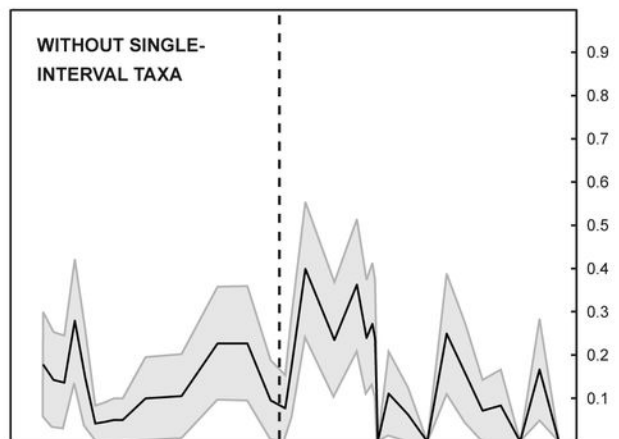

|                |      |      |              |       |   |          |     |          |       |      |      |
|----------------|------|------|--------------|-------|---|----------|-----|----------|-------|------|------|
| Jam.           | Ibex | Dav. | Margaritatus | Spin. | T | Serp.    | B V | Thouars. | Disp. | Pse. | Aal. |
| Early          |      |      | Late         |       |   | Early    | M   | Late     |       |      |      |
| PLIENSBAICHIAN |      |      |              |       |   | TOARCIAN |     |          |       |      |      |

190 188 186 184 182 180 178 176  
Age (Ma)

|                |      |      |              |       |   |          |     |          |       |      |      |
|----------------|------|------|--------------|-------|---|----------|-----|----------|-------|------|------|
| Jam.           | Ibex | Dav. | Margaritatus | Spin. | T | Serp.    | B V | Thouars. | Disp. | Pse. | Aal. |
| Early          |      |      | Late         |       |   | Early    | M   | Late     |       |      |      |
| PLIENSBAICHIAN |      |      |              |       |   | TOARCIAN |     |          |       |      |      |

190 188 186 184 182 180 178 176  
Age (Ma)
