# Supplementary material
Source: publisher figshare collection journal article supplement (https://geolsoc.figshare.com/articles/dataset/_/3454760)
Supplement: Supplementary file 3 [file 1]

### EXTINCTION RATES (SPECIES)

### ORIGINATION RATES (SPECIES)

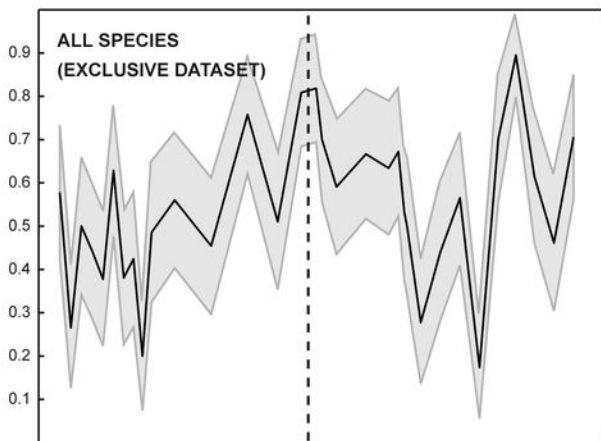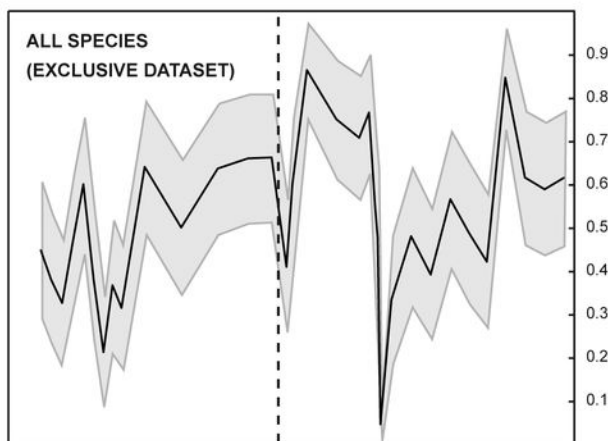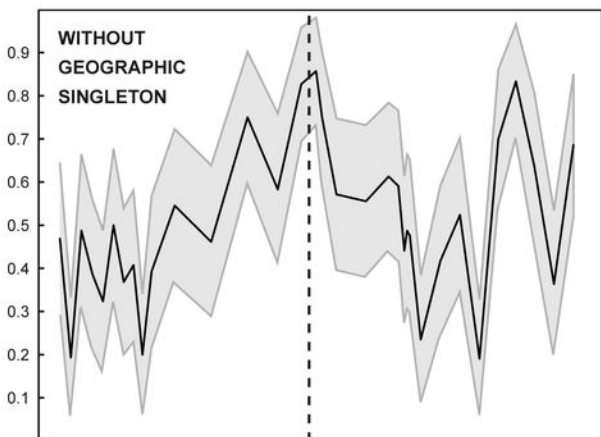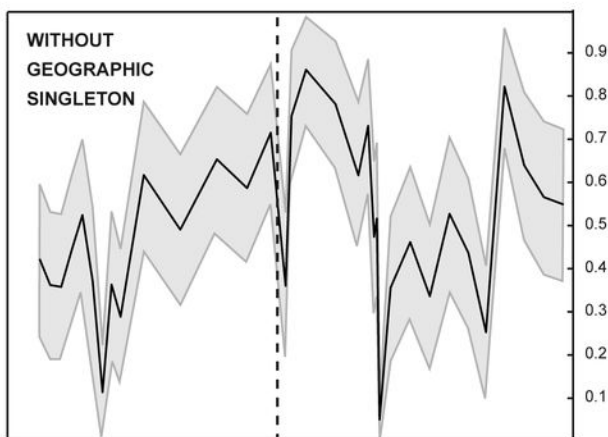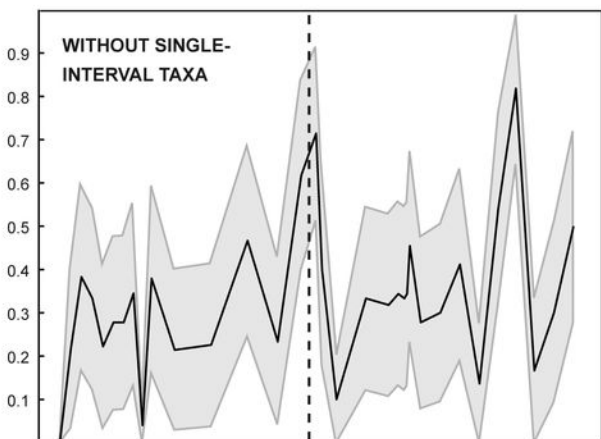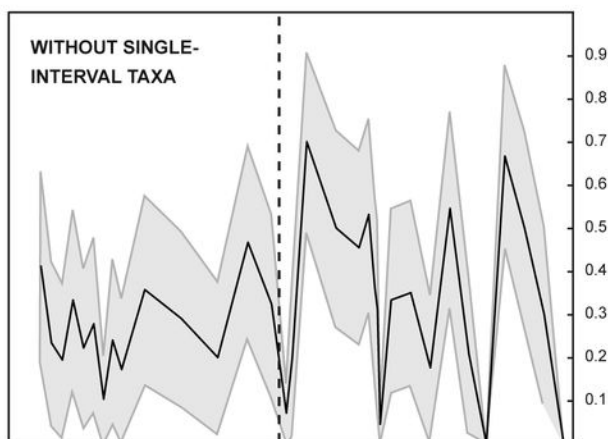

|               |      |      |              |       |          |       |      |          |       |      |      |
|---------------|------|------|--------------|-------|----------|-------|------|----------|-------|------|------|
| Jam.          | Ibex | Dav. | Margaritatus | Spin. | T        | Serp. | B V  | Thouars. | Disp. | Pse. | Aal. |
| Early         |      |      | Late         |       | Early    | M     | Late |          |       |      |      |
| PLIENSBACHIAN |      |      |              |       | TOARCIAN |       |      |          |       |      |      |

Age (Ma)

|               |      |      |              |       |          |       |      |          |       |      |      |
|---------------|------|------|--------------|-------|----------|-------|------|----------|-------|------|------|
| Jam.          | Ibex | Dav. | Margaritatus | Spin. | T        | Serp. | B V  | Thouars. | Disp. | Pse. | Aal. |
| Early         |      |      | Late         |       | Early    | M     | Late |          |       |      |      |
| PLIENSBACHIAN |      |      |              |       | TOARCIAN |       |      |          |       |      |      |

Age (Ma)
